# Supplementary material
Source: PubMed Central journal article supplement (PMC1857708)
Supplement: ppat.0030049.sg004.pdf [file ppat.0030049.sg004.pdf]

**Figure S4  
(A)**

| <b>Protein</b> | <b>Residues</b> | <b>Sequence</b>       | <b>Organism</b>               |
|----------------|-----------------|-----------------------|-------------------------------|
| <b>RsbV</b>    | <b>51-63</b>    | V S Y M D S T G L G V | <i>B. subtilis</i>            |
| <b>BldG</b>    | <b>52-64</b>    | V D F L D S T G L G V | <i>S. coelicolor</i>          |
| <b>Slr1859</b> | <b>52-64</b>    | L E Y M S S A G L R I | <i>Synechocystis</i> PCC 6803 |
| <b>Slr1856</b> | <b>49-61</b>    | V P Y M S S A G L R L | <i>Synechocystis</i> PCC 6803 |
| <b>SpoIIAA</b> | <b>53-65</b>    | L S F M D S S G L G V | <i>B. subtilis</i>            |
| <b>RsbR</b>    | <b>200-212</b>  | V P V V D T M V A H H | <i>B. subtilis</i>            |
| <b>RsbS</b>    | <b>54-66</b>    | V D M I D S F I A K V | <i>B. subtilis</i>            |
| <b>0516c</b>   | <b>76-88</b>    | L S H F S G A G I S L | <i>M. tuberculosis</i>        |

**(B)**

**Family Member    Sequence**

|                |               |
|----------------|---------------|
| <b>Rv1904</b>  | M G S C A Y A |
| <b>Rv2638</b>  | M G C C A F A |
| <b>Rv1365c</b> | M G C C A V A |
| <b>Rv0941c</b> | M P V Y P T E |
| <b>Rv0516c</b> | F S G A G I S |
| <b>Rv3687c</b> | L G S V G L K |
| <b>SpoIIAA</b> | M D S S G L G |
| <b>RsbV</b>    | M D S T G L G |
