# Supplementary material
Source: PubMed Central journal article supplement (PMC1857708)

# Figure S1

(A)

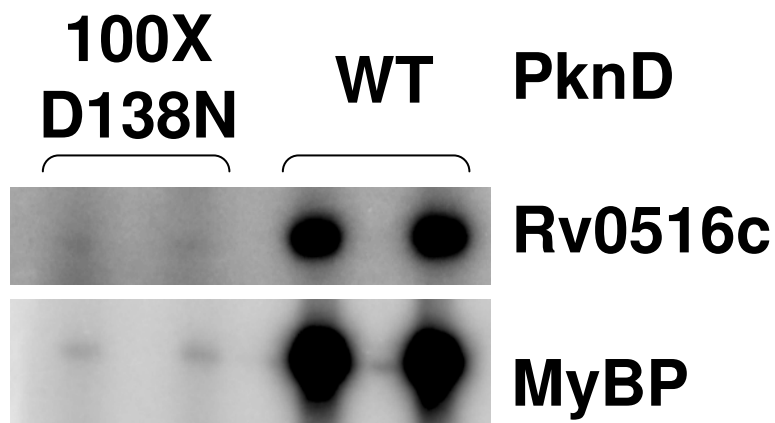

(B)

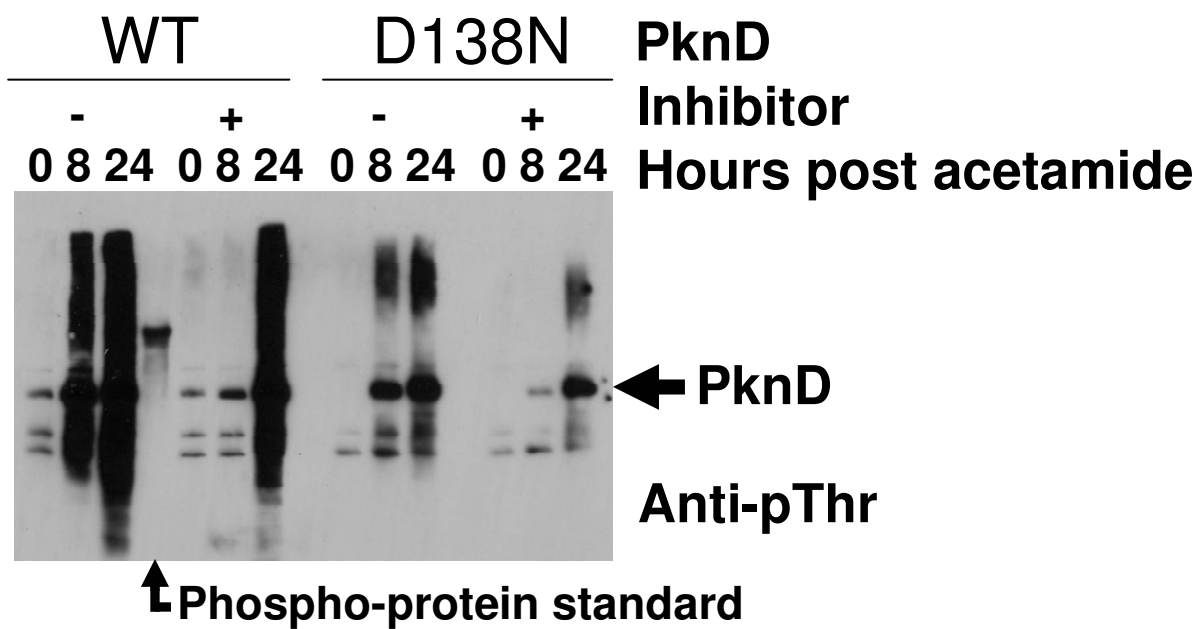

Supplement: ppat.0030049.sg001.pdf [file ppat.0030049.sg001.pdf]

**Figure S2**

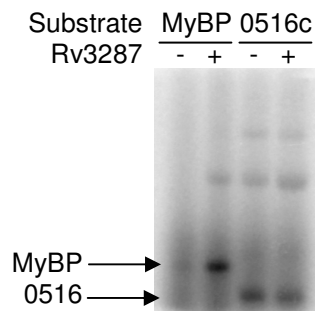

Supplement: ppat.0030049.sg002.pdf [file ppat.0030049.sg002.pdf]

**Figure S3**

**(A)**

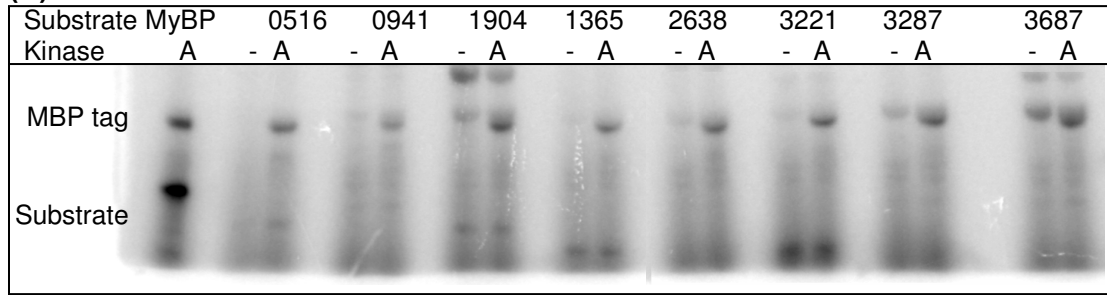

**(B)**

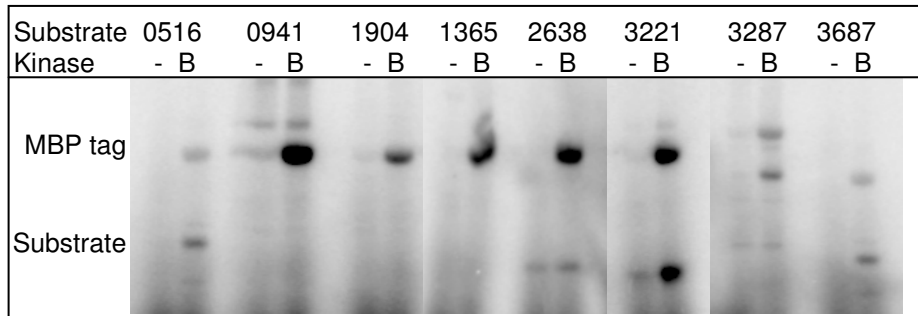

**(C)**

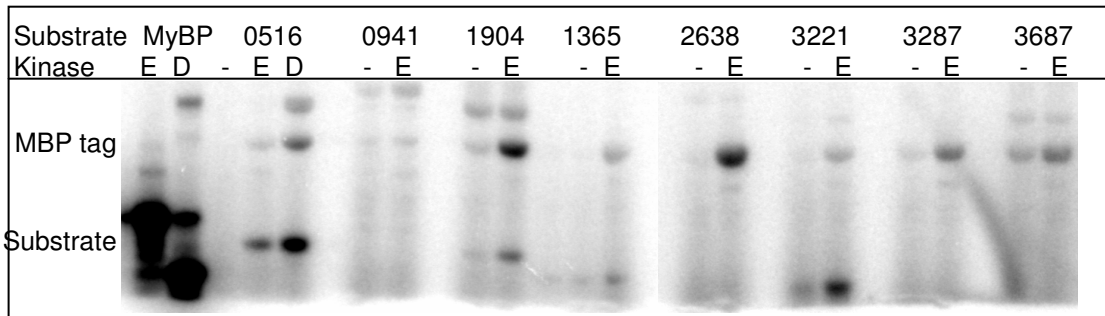

**(D)**

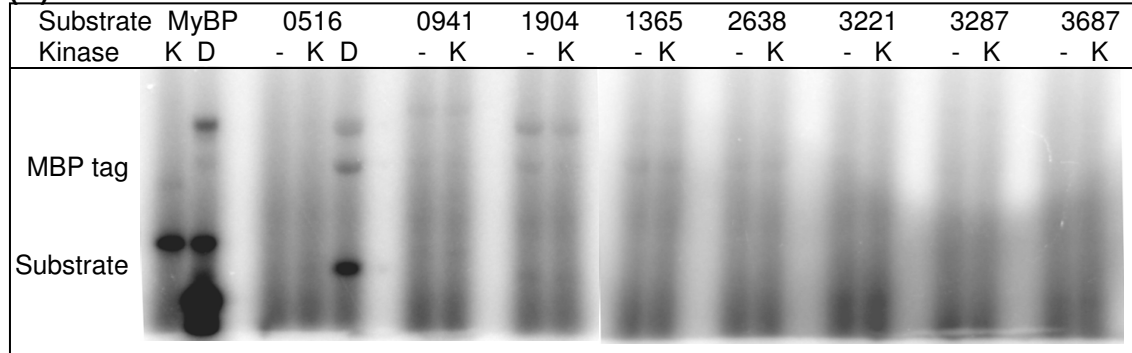

Supplement: ppat.0030049.sg003.pdf [file ppat.0030049.sg003.pdf]
